# Supplementary figures and images for: Encoding and control of orientation to airflow by a set of Drosophila fan-shaped body neurons
Source: eLife journal article supplement (doi:10.7554/elife.61510), 2020-12-30

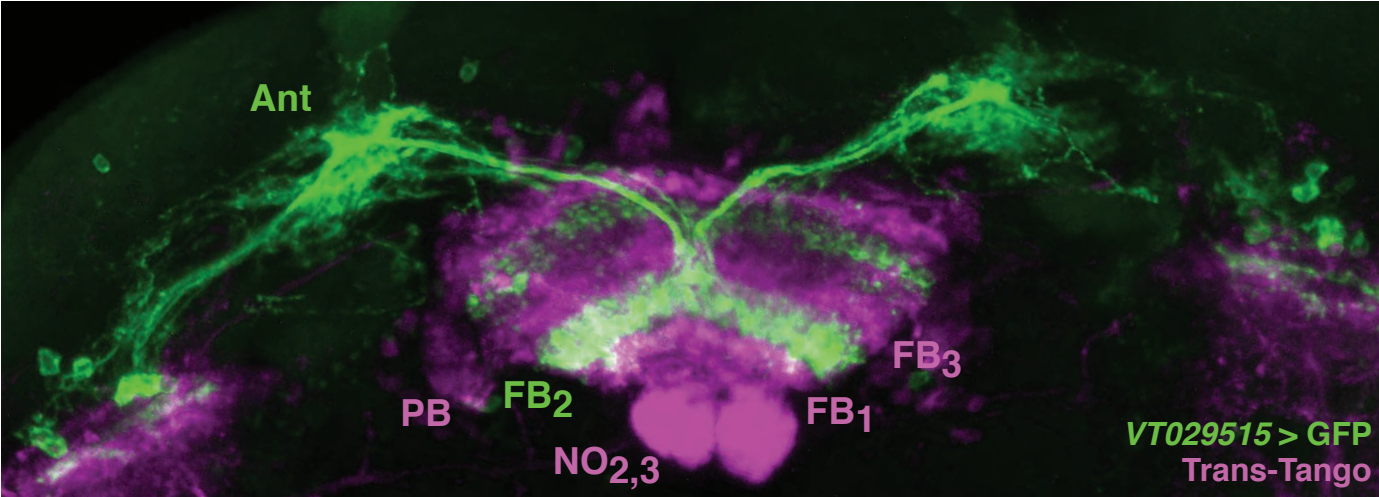

Supplement: supp [file elife_poa_e61510_Figure_5_figure_supplement_1.pdf › elife_poa_e61510_Figure_5_figure_supplement_1.pdf]
